# Supplementary material for: Identification of molecular features correlating with tumor immunity in gastric cancer by multi-omics data analysis
Source: PubMed Central journal article supplement — Ann Transl Med. 2020 Sep;8(17):1050. doi: 10.21037/atm-20-922 (PMC7575957; doi:10.21037/atm-20-922), 2020-09
Supplement: atm-08-17-1050-supplementary.pdf [file atm-08-17-1050-supplementary.pdf]

**Table S1. The genes whose mutations show significant correlations with immune cytolytic activity (ICA) and PD-L1 expression levels (Mann-Whitney U test, FDR<0.05).**

| ICA (Mutated vs. Wildtype) |                 |          | PD-L1 (Mutated vs. Wildtype) |                 |        |
|----------------------------|-----------------|----------|------------------------------|-----------------|--------|
| Gene                       | <i>p</i> -value | FDR      | Gene                         | <i>p</i> -value | FDR    |
| <i>PIK3CA</i>              | 1.82E-09        | 3.77E-06 | <i>MDN1</i>                  | 2.28E-07        | 0.0002 |
| <i>ARID1B</i>              | 7.68E-07        | 0.0004   | <i>BTAF1</i>                 | 2.15E-06        | 0.0009 |
| <i>GTF3C1</i>              | 4.54E-06        | 0.0013   | <i>CIC</i>                   | 3.80E-06        | 0.0013 |
| <i>MDN1</i>                | 8.29E-06        | 0.0016   | <i>ARID1B</i>                | 5.76E-06        | 0.0015 |
| <i>SOGA2</i>               | 9.12E-06        | 0.0016   | <i>MLL2</i>                  | 6.30E-06        | 0.0015 |
| <i>LRRN3</i>               | 2.92E-05        | 0.0026   | <i>SOGA2</i>                 | 7.08E-06        | 0.0015 |
| <i>PTPRS</i>               | 4.75E-05        | 0.0033   | <i>KCNB2</i>                 | 1.01E-05        | 0.0016 |
| <i>RNF213</i>              | 4.90E-05        | 0.0033   | <i>YLPM1</i>                 | 1.06E-05        | 0.0016 |
| <i>ARID1A</i>              | 5.10E-05        | 0.0033   | <i>BCOR</i>                  | 1.31E-05        | 0.0018 |
| <i>YLPM1</i>               | 5.84E-05        | 0.0034   | <i>DOCK3</i>                 | 1.66E-05        | 0.0021 |
| <i>CIC</i>                 | 6.83E-05        | 0.0038   | <i>GTF3C1</i>                | 1.73E-05        | 0.0021 |
| <i>KIAA1109</i>            | 0.0001          | 0.0053   | <i>KIAA1109</i>              | 1.76E-05        | 0.0020 |
| <i>ATM</i>                 | 0.0001          | 0.0056   | <i>PIK3CA</i>                | 1.79E-05        | 0.0020 |
| <i>BCOR</i>                | 0.0001          | 0.0055   | <i>HSPG2</i>                 | 1.96E-05        | 0.0020 |
| <i>BTAF1</i>               | 0.0002          | 0.0059   | <i>ANK3</i>                  | 2.01E-05        | 0.0020 |
| <i>ABCC9</i>               | 0.0002          | 0.0058   | <i>VPS13B</i>                | 2.34E-05        | 0.0022 |
| <i>TCHH</i>                | 0.0002          | 0.0059   | <i>LRPI</i>                  | 2.99E-05        | 0.0026 |
| <i>EP400</i>               | 0.0003          | 0.0078   | <i>NLRC5</i>                 | 3.06E-05        | 0.0025 |
| <i>HSPG2</i>               | 0.0003          | 0.0078   | <i>COL7A1</i>                | 3.12E-05        | 0.0025 |
| <i>CHD5</i>                | 0.0003          | 0.0079   | <i>HLA-B</i>                 | 3.14E-05        | 0.0024 |
| <i>TNS3</i>                | 0.0003          | 0.0086   | <i>PGM5</i>                  | 4.22E-05        | 0.0031 |
| <i>DMD</i>                 | 0.0004          | 0.0086   | <i>ZZEF1</i>                 | 4.65E-05        | 0.0033 |
| <i>ABCB4</i>               | 0.0004          | 0.0091   | <i>ZC3H13</i>                | 5.38E-05        | 0.0034 |
| <i>DOCK3</i>               | 0.0004          | 0.0092   | <i>DMD</i>                   | 5.41E-05        | 0.0033 |
| <i>PGM5</i>                | 0.0006          | 0.0116   | <i>ABCC9</i>                 | 5.55E-05        | 0.0033 |
| <i>DIP2C</i>               | 0.0006          | 0.0118   | <i>DOPEY1</i>                | 8.06E-05        | 0.0044 |
| <i>TENM2</i>               | 0.0006          | 0.0118   | <i>SMARCA4</i>               | 8.90E-05        | 0.0047 |
| <i>SYNE2</i>               | 0.0006          | 0.0118   | <i>SYNE2</i>                 | 9.04E-05        | 0.0047 |
| <i>ITPR3</i>               | 0.0006          | 0.0118   | <i>CHD9</i>                  | 9.25E-05        | 0.0047 |
| <i>SRCAP</i>               | 0.0006          | 0.0120   | <i>MTOR</i>                  | 0.0001          | 0.0049 |
| <i>EVPL</i>                | 0.0008          | 0.0140   | <i>ATM</i>                   | 0.0001          | 0.0054 |
| <i>LRPI</i>                | 0.0008          | 0.0140   | <i>HECTD4</i>                | 0.0001          | 0.0054 |
| <i>WDFY3</i>               | 0.0009          | 0.0152   | <i>CSPG4</i>                 | 0.0001          | 0.0055 |
| <i>TIAM1</i>               | 0.0009          | 0.0156   | <i>FHDC1</i>                 | 0.0001          | 0.0054 |
| <i>MLL2</i>                | 0.0009          | 0.0155   | <i>ARHGAP25</i>              | 0.0001          | 0.0055 |
| <i>MXRA5</i>               | 0.0010          | 0.0164   | <i>PCDHA4</i>                | 0.0001          | 0.0056 |
| <i>ADD3</i>                | 0.0010          | 0.0164   | <i>PLXNA4</i>                | 0.0001          | 0.0057 |
| <i>VPS13B</i>              | 0.0011          | 0.0170   | <i>HUWE1</i>                 | 0.0001          | 0.0055 |
| <i>PLEC</i>                | 0.0011          | 0.0171   | <i>ZNF407</i>                | 0.0001          | 0.0056 |
| <i>TNS1</i>                | 0.0011          | 0.0173   | <i>ASXL1</i>                 | 0.0001          | 0.0056 |
| <i>HUWE1</i>               | 0.0012          | 0.0180   | <i>PTPRS</i>                 | 0.0002          | 0.0057 |
| <i>MTOR</i>                | 0.0012          | 0.0183   | <i>DNAH2</i>                 | 0.0002          | 0.0058 |
| <i>TLL1</i>                | 0.0012          | 0.0182   | <i>EPG5</i>                  | 0.0002          | 0.0059 |
| <i>CELSR3</i>              | 0.0013          | 0.0184   | <i>POLQ</i>                  | 0.0002          | 0.0062 |
| <i>MLL3</i>                | 0.0013          | 0.0189   | <i>FLNC</i>                  | 0.0002          | 0.0061 |
| <i>ADAMTS1</i>             | 0.0014          | 0.0190   | <i>UBR5</i>                  | 0.0002          | 0.0060 |
| <i>WNK1</i>                | 0.0014          | 0.0197   | <i>ARID1A</i>                | 0.0002          | 0.0066 |
| <i>GRIN2B</i>              | 0.0014          | 0.0196   | <i>ADD3</i>                  | 0.0002          | 0.0067 |
| <i>STAB1</i>               | 0.0015          | 0.0202   | <i>HERC1</i>                 | 0.0002          | 0.0067 |

|                 |        |        |                 |        |        |
|-----------------|--------|--------|-----------------|--------|--------|
| <i>DOPEY1</i>   | 0.0016 | 0.0204 | <i>DNAH10</i>   | 0.0002 | 0.0072 |
| <i>PCDHA4</i>   | 0.0016 | 0.0211 | <i>PCDH10</i>   | 0.0003 | 0.0077 |
| <i>FBN3</i>     | 0.0017 | 0.0215 | <i>COL5A1</i>   | 0.0003 | 0.0077 |
| <i>CACNA1L</i>  | 0.0018 | 0.0222 | <i>TLN1</i>     | 0.0003 | 0.0078 |
| <i>ERBB3</i>    | 0.0019 | 0.0228 | <i>RNF213</i>   | 0.0003 | 0.0077 |
| <i>DYSF</i>     | 0.0019 | 0.0235 | <i>LRRN3</i>    | 0.0003 | 0.0077 |
| <i>LAMB2</i>    | 0.0019 | 0.0234 | <i>SPEN</i>     | 0.0003 | 0.0077 |
| <i>FBXW7</i>    | 0.0021 | 0.0251 | <i>NALCN</i>    | 0.0003 | 0.0077 |
| <i>ARHGEF1</i>  | 0.0021 | 0.0251 | <i>ADAMTS</i>   | 0.0003 | 0.0079 |
| <i>RPI</i>      | 0.0022 | 0.0251 | <i>SPEG</i>     | 0.0003 | 0.0079 |
| <i>MYH10</i>    | 0.0023 | 0.0260 | <i>FAT2</i>     | 0.0003 | 0.0078 |
| <i>KCNU1</i>    | 0.0025 | 0.0277 | <i>MLL3</i>     | 0.0003 | 0.0079 |
| <i>FLNA</i>     | 0.0025 | 0.0275 | <i>MED12L</i>   | 0.0003 | 0.0082 |
| <i>COL6A6</i>   | 0.0025 | 0.0274 | <i>GPATCH8</i>  | 0.0004 | 0.0086 |
| <i>KCNB2</i>    | 0.0025 | 0.0274 | <i>WDFY3</i>    | 0.0004 | 0.0087 |
| <i>CDH1</i>     | 0.0025 | 0.0273 | <i>SCAF4</i>    | 0.0004 | 0.0089 |
| <i>KDM2B</i>    | 0.0026 | 0.0275 | <i>KDM2B</i>    | 0.0004 | 0.0091 |
| <i>LRRC7</i>    | 0.0027 | 0.0283 | <i>FLNA</i>     | 0.0004 | 0.0091 |
| <i>COL7A1</i>   | 0.0029 | 0.0297 | <i>CELSR3</i>   | 0.0004 | 0.0091 |
| <i>NCOR1</i>    | 0.0029 | 0.0300 | <i>TCHH</i>     | 0.0004 | 0.0091 |
| <i>PRDM2</i>    | 0.0029 | 0.0299 | <i>TIAM1</i>    | 0.0004 | 0.0091 |
| <i>DNAH10</i>   | 0.0029 | 0.0298 | <i>PRRC2A</i>   | 0.0004 | 0.0090 |
| <i>NLRC5</i>    | 0.0030 | 0.0299 | <i>CNOT1</i>    | 0.0004 | 0.0090 |
| <i>HLA-B</i>    | 0.0032 | 0.0314 | <i>CREBBP</i>   | 0.0004 | 0.0090 |
| <i>CSPG4</i>    | 0.0033 | 0.0317 | <i>CACNA1A</i>  | 0.0004 | 0.0091 |
| <i>PCNXL2</i>   | 0.0035 | 0.0332 | <i>KIAA1462</i> | 0.0005 | 0.0103 |
| <i>ABCA12</i>   | 0.0035 | 0.0331 | <i>ANK1</i>     | 0.0005 | 0.0107 |
| <i>FAT3</i>     | 0.0036 | 0.0336 | <i>CMYA5</i>    | 0.0005 | 0.0109 |
| <i>NUP98</i>    | 0.0037 | 0.0342 | <i>ARFGEF1</i>  | 0.0006 | 0.0116 |
| <i>PLXNA4</i>   | 0.0038 | 0.0351 | <i>KCNU1</i>    | 0.0007 | 0.0125 |
| <i>ZNF407</i>   | 0.0040 | 0.0363 | <i>XIRP2</i>    | 0.0007 | 0.0130 |
| <i>CDH10</i>    | 0.0041 | 0.0369 | <i>IFT172</i>   | 0.0007 | 0.0130 |
| <i>PCDH10</i>   | 0.0041 | 0.0367 | <i>CHD5</i>     | 0.0007 | 0.0132 |
| <i>CMYA5</i>    | 0.0041 | 0.0366 | <i>DYSF</i>     | 0.0007 | 0.0132 |
| <i>TLN1</i>     | 0.0043 | 0.0379 | <i>CDH10</i>    | 0.0008 | 0.0141 |
| <i>GRM1</i>     | 0.0044 | 0.0382 | <i>EVPL</i>     | 0.0008 | 0.0139 |
| <i>ANK3</i>     | 0.0045 | 0.0384 | <i>GRM1</i>     | 0.0009 | 0.0150 |
| <i>KIAA1462</i> | 0.0045 | 0.0383 | <i>OBSCN</i>    | 0.0009 | 0.0152 |
| <i>USP9X</i>    | 0.0047 | 0.0390 | <i>PLEC</i>     | 0.0009 | 0.0153 |
| <i>CREBBP</i>   | 0.0048 | 0.0395 | <i>MYCBP2</i>   | 0.0009 | 0.0155 |
| <i>MLL</i>      | 0.0048 | 0.0394 | <i>TNS3</i>     | 0.0010 | 0.0165 |
| <i>HERC1</i>    | 0.0048 | 0.0397 | <i>SON</i>      | 0.0011 | 0.0170 |
| <i>PTPRM</i>    | 0.0050 | 0.0400 | <i>SRCAP</i>    | 0.0011 | 0.0172 |
| <i>UBR5</i>     | 0.0051 | 0.0404 | <i>FER1L6</i>   | 0.0011 | 0.0172 |
| <i>ITPR2</i>    | 0.0052 | 0.0403 | <i>WNK1</i>     | 0.0011 | 0.0175 |
| <i>POLQ</i>     | 0.0052 | 0.0405 | <i>ALMS1</i>    | 0.0011 | 0.0175 |
| <i>PTEN</i>     | 0.0054 | 0.0413 | <i>CACNA1L</i>  | 0.0012 | 0.0177 |
| <i>BCHE</i>     | 0.0057 | 0.0438 | <i>KIF16B</i>   | 0.0013 | 0.0184 |
| <i>MAP7D3</i>   | 0.0059 | 0.0444 | <i>NCOR1</i>    | 0.0013 | 0.0184 |
| <i>GRID1</i>    | 0.0059 | 0.0445 | <i>POLE</i>     | 0.0013 | 0.0189 |
| <i>TRPM1</i>    | 0.0061 | 0.0452 | <i>OPLAH</i>    | 0.0013 | 0.0188 |
| <i>IMPG2</i>    | 0.0061 | 0.0454 | <i>PCDHB12</i>  | 0.0013 | 0.0189 |
| <i>CACNA1A</i>  | 0.0063 | 0.0467 | <i>PTPRN2</i>   | 0.0014 | 0.0189 |
| <i>ARFGEF1</i>  | 0.0064 | 0.0466 | <i>ACACB</i>    | 0.0014 | 0.0196 |

|               |        |        |
|---------------|--------|--------|
| <i>ZC3H13</i> | 0.0067 | 0.0483 |
| <i>ZIC1</i>   | 0.0067 | 0.0482 |
| <i>WISPI</i>  | 0.0069 | 0.0491 |

|                |        |        |
|----------------|--------|--------|
| <i>NOTCH4</i>  | 0.0015 | 0.0200 |
| <i>MLL</i>     | 0.0015 | 0.0200 |
| <i>ZDBF2</i>   | 0.0015 | 0.0201 |
| <i>FAT4</i>    | 0.0015 | 0.0201 |
| <i>PDZRN3</i>  | 0.0017 | 0.0215 |
| <i>CHST1</i>   | 0.0017 | 0.0217 |
| <i>RYR1</i>    | 0.0017 | 0.0218 |
| <i>ZIC1</i>    | 0.0018 | 0.0221 |
| <i>ZNF71</i>   | 0.0018 | 0.0224 |
| <i>PCDHA13</i> | 0.0019 | 0.0235 |
| <i>TRPM2</i>   | 0.0021 | 0.0250 |
| <i>PCDHB5</i>  | 0.0021 | 0.0250 |
| <i>EIF5B</i>   | 0.0021 | 0.0251 |
| <i>DIP2C</i>   | 0.0022 | 0.0251 |
| <i>EP400</i>   | 0.0022 | 0.0251 |
| <i>FBN3</i>    | 0.0022 | 0.0256 |
| <i>ARID2</i>   | 0.0022 | 0.0254 |
| <i>LMO7</i>    | 0.0023 | 0.0256 |
| <i>TET1</i>    | 0.0024 | 0.0263 |
| <i>MYH10</i>   | 0.0025 | 0.0276 |
| <i>CSMD1</i>   | 0.0026 | 0.0274 |
| <i>DCC</i>     | 0.0027 | 0.0282 |
| <i>BCL9L</i>   | 0.0027 | 0.0283 |
| <i>WISPI</i>   | 0.0027 | 0.0284 |
| <i>PRDM16</i>  | 0.0028 | 0.0293 |
| <i>ATP2B3</i>  | 0.0029 | 0.0300 |
| <i>ROS1</i>    | 0.0030 | 0.0300 |
| <i>NAV3</i>    | 0.0030 | 0.0300 |
| <i>ZFH3</i>    | 0.0030 | 0.0300 |
| <i>MUC4</i>    | 0.0030 | 0.0299 |
| <i>PCDH11X</i> | 0.0032 | 0.0313 |
| <i>PCDHA8</i>  | 0.0032 | 0.0317 |
| <i>GPR98</i>   | 0.0034 | 0.0328 |
| <i>AFF2</i>    | 0.0034 | 0.0331 |
| <i>PTPRM</i>   | 0.0034 | 0.0331 |
| <i>TRPM1</i>   | 0.0035 | 0.0330 |
| <i>NOS1</i>    | 0.0035 | 0.0334 |
| <i>KALRN</i>   | 0.0036 | 0.0337 |
| <i>FBN2</i>    | 0.0038 | 0.0352 |
| <i>MYOF</i>    | 0.0038 | 0.0351 |
| <i>PTCHD2</i>  | 0.0038 | 0.0349 |
| <i>ITPR3</i>   | 0.0038 | 0.0350 |
| <i>DNAH8</i>   | 0.0041 | 0.0368 |
| <i>SLC8A1</i>  | 0.0042 | 0.0371 |
| <i>CACNA1E</i> | 0.0043 | 0.0376 |
| <i>TPO</i>     | 0.0044 | 0.0382 |
| <i>MAP7D3</i>  | 0.0044 | 0.0381 |
| <i>LRRC7</i>   | 0.0046 | 0.0388 |
| <i>ITPR2</i>   | 0.0046 | 0.0389 |
| <i>KCNMA1</i>  | 0.0046 | 0.0388 |
| <i>PCDHGA6</i> | 0.0047 | 0.0390 |
| <i>MYH8</i>    | 0.0047 | 0.0389 |
| <i>PXDNL</i>   | 0.0049 | 0.0397 |
| <i>COL6A6</i>  | 0.0049 | 0.0398 |

|                 |        |        |
|-----------------|--------|--------|
| <i>APC</i>      | 0.0049 | 0.0396 |
| <i>STAB1</i>    | 0.0049 | 0.0395 |
| <i>RPI</i>      | 0.0049 | 0.0394 |
| <i>ARHGEF1</i>  | 0.0050 | 0.0399 |
| <i>KIAA1549</i> | 0.0051 | 0.0402 |
| <i>TNS1</i>     | 0.0051 | 0.0402 |
| <i>PKHD1</i>    | 0.0053 | 0.0411 |
| <i>TNC</i>      | 0.0053 | 0.0410 |
| <i>ZNF462</i>   | 0.0055 | 0.0425 |
| <i>FAT3</i>     | 0.0056 | 0.0431 |
| <i>PCNT</i>     | 0.0058 | 0.0439 |
| <i>BCLAF1</i>   | 0.0060 | 0.0449 |
| <i>LAMB2</i>    | 0.0060 | 0.0451 |
| <i>BCHE</i>     | 0.0061 | 0.0455 |
| <i>ANK2</i>     | 0.0063 | 0.0462 |
| <i>MYH11</i>    | 0.0064 | 0.0466 |
| <i>CCDC108</i>  | 0.0064 | 0.0467 |
| <i>FBXW7</i>    | 0.0066 | 0.0476 |
| <i>NCOA6</i>    | 0.0067 | 0.0482 |
| <i>BRCA2</i>    | 0.0067 | 0.0481 |
| <i>JARID2</i>   | 0.0069 | 0.0492 |
| <i>CHD7</i>     | 0.0069 | 0.0491 |
| <i>NUP214</i>   | 0.0070 | 0.0492 |
